# Supplementary material for: Effects Of Acclimation, Population, And Sex On Behavioral Thermoregulation, CTMax, Symptoms Of Heat Stress, And Gene Expression of Melanoplus Differentialis, A Generalist Grasshopper - Does Temporal Thermal Heterogeneity Prepare Populations For A Warming World?
Source: Research Square preprint supplement (doi:10.21203/rs.3.rs-548239/v1), 2021-06-16
Supplement: Supplementary file 1 [file 3d46fbdf8e56aa3ef4ce748c.docx]

Supplementary Figure 2: Average daily temperature range (per month; DRAvg) of selected sites (± 1 standard error) over a 101-year time period. Only MO and IL did not significantly differ from one another (Tukey HSD; p = 0.12 for MO-IL, p < 0.001 for all other site comparisons). Data from the 101-year period came from March 1, 1915-Oct. 31, 2015; data from the months of November, December, January, and February were omitted.
